# Supplementary material
Source: MDPI journal article supplement (https://www.mdpi.com/2073-4433/9/10/393)
Supplement: s1 [file s1]

# Supplementary material for “A study on elevated concentrations of submicrometer particles in an urban atmosphere”

Hee-joo Cho, Jia Kang, Dohyeong Kim, Arom Seo, Minhan Park, Hungsoo Joo, and Kihong Park\*

**Table S1.** Comparison of average parameters before, during, and after NPF events.

| Measured parameters | Unit                             | Before NPF event (3 hours) | During NPF event (3 hours) | After NPF event (3 hours) |
|---------------------|----------------------------------|----------------------------|----------------------------|---------------------------|
| T                   | °C                               | 22.3 ± 3.58                | 27.2 ± 3.40                | 17.2 ± 3.83               |
| RH                  | %                                | 41.9 ± 13.4                | 25.4 ± 4.05                | 60.8 ± 17.9               |
| Solar radiation     | W/m <sup>2</sup>                 | 528.5 ± 277.0              | 779.9 ± 264.9              | 88.24 ± 156.4             |
| O <sub>3</sub>      | ppb                              | 0.053 ± 0.013              | 0.068 ± 0.020              | 0.043 ± 0.014             |
| PM <sub>2.5</sub>   | µg/m <sup>3</sup>                | 34.1 ± 8.36                | 20.0 ± 7.07                | 30.0 ± 7.93               |
| Surface area        | µm <sup>2</sup> /cm <sup>3</sup> | 618 ± 152                  | 499 ± 173                  | 721 ± 219                 |
